# Supplementary material
Source: PubMed Central journal article supplement (PMC6934220)
Supplement: jci-130-130892-s255.pdf [file jci-130-130892-s255.pdf]

1 **Exosomal long noncoding RNA *LNMAT2* promotes lymphatic metastasis in bladder**  
2 **cancer**

3 Changhao Chen<sup>1,2#</sup>, Yuming Luo<sup>2,3#</sup>, Wang He<sup>1,2#</sup>, Yue Zhao<sup>4#</sup>, Yao Kong<sup>5</sup>, Hongwei Liu<sup>1,2</sup>,  
4 Guangzheng Zhong<sup>1,2</sup>, Yuting Li<sup>6</sup>, Jun Li<sup>7</sup>, Jian Huang<sup>1,2\*</sup>, Rufu Chen<sup>8\*</sup>, Tianxin Lin<sup>1,2\*</sup>

5 <sup>1</sup>Department of Urology, Sun Yat-sen Memorial Hospital, Sun Yat-sen University, Guangzhou,  
6 Guangdong, P. R. China

7 <sup>2</sup>Guangdong Provincial Key Laboratory of Malignant Tumor Epigenetics and Gene Regulation, Sun  
8 Yat-sen Memorial Hospital, State Key Laboratory of Oncology in South China, Guangzhou,  
9 Guangdong, P. R. China

10 <sup>3</sup>Department of Pancreatobiliary Surgery, Sun Yat-sen Memorial Hospital, Guangzhou, Guangdong, P.  
11 R. China

12 <sup>4</sup>Department of Interventional Oncology, the First Affiliated Hospital, Sun Yat-sen University,  
13 Guangzhou, Guangdong, P. R. China

14 <sup>5</sup>Department of Ultrasound, Sun Yat-sen Memorial Hospital, Guangzhou, Guangdong, P. R. China

15 <sup>6</sup>Department of Medical Oncology, Sun Yat-sen Memorial Hospital, Guangzhou, Guangdong, P. R.  
16 China

17 <sup>7</sup>Department of Biochemistry, Zhongshan School of Medicine, Sun Yat-sen University, Guangzhou,  
18 Guangdong, P. R. China

19 <sup>8</sup>Department of General Surgery, Guangdong Provincial People's Hospital, Guangdong Academy of  
20 Medical Sciences, Guangzhou, Guangdong, P. R. China

21 **\*Correspondence to:**

22 Tianxin Lin M.D. Ph.D. & Jian Huang, M.D. Ph.D. Department of Urology, Sun Yat-sen Memorial  
23 Hospital, 107 Yanjiangxi Road, Yuexiu District, Guangzhou, Guangdong, 510120, P. R. China; E-mail:  
24 lintx@mail.sysu.edu.cn & urolhj@sina.com; Tel.: +86-20-34070447; Fax: +86-20-81332336.

25 Rufu Chen, M.D. Ph.D. Department of General Surgery, Guangdong Provincial People's Hospital,  
26 Guangdong Academy of Medical Sciences, Guangzhou, Guangdong, 510080, PR China; E-mail:  
27 chenrf63@163.com;

28 <sup>#</sup>These authors contributed equally to this study.

29 **The authors have declared that no conflict of interest exists.**

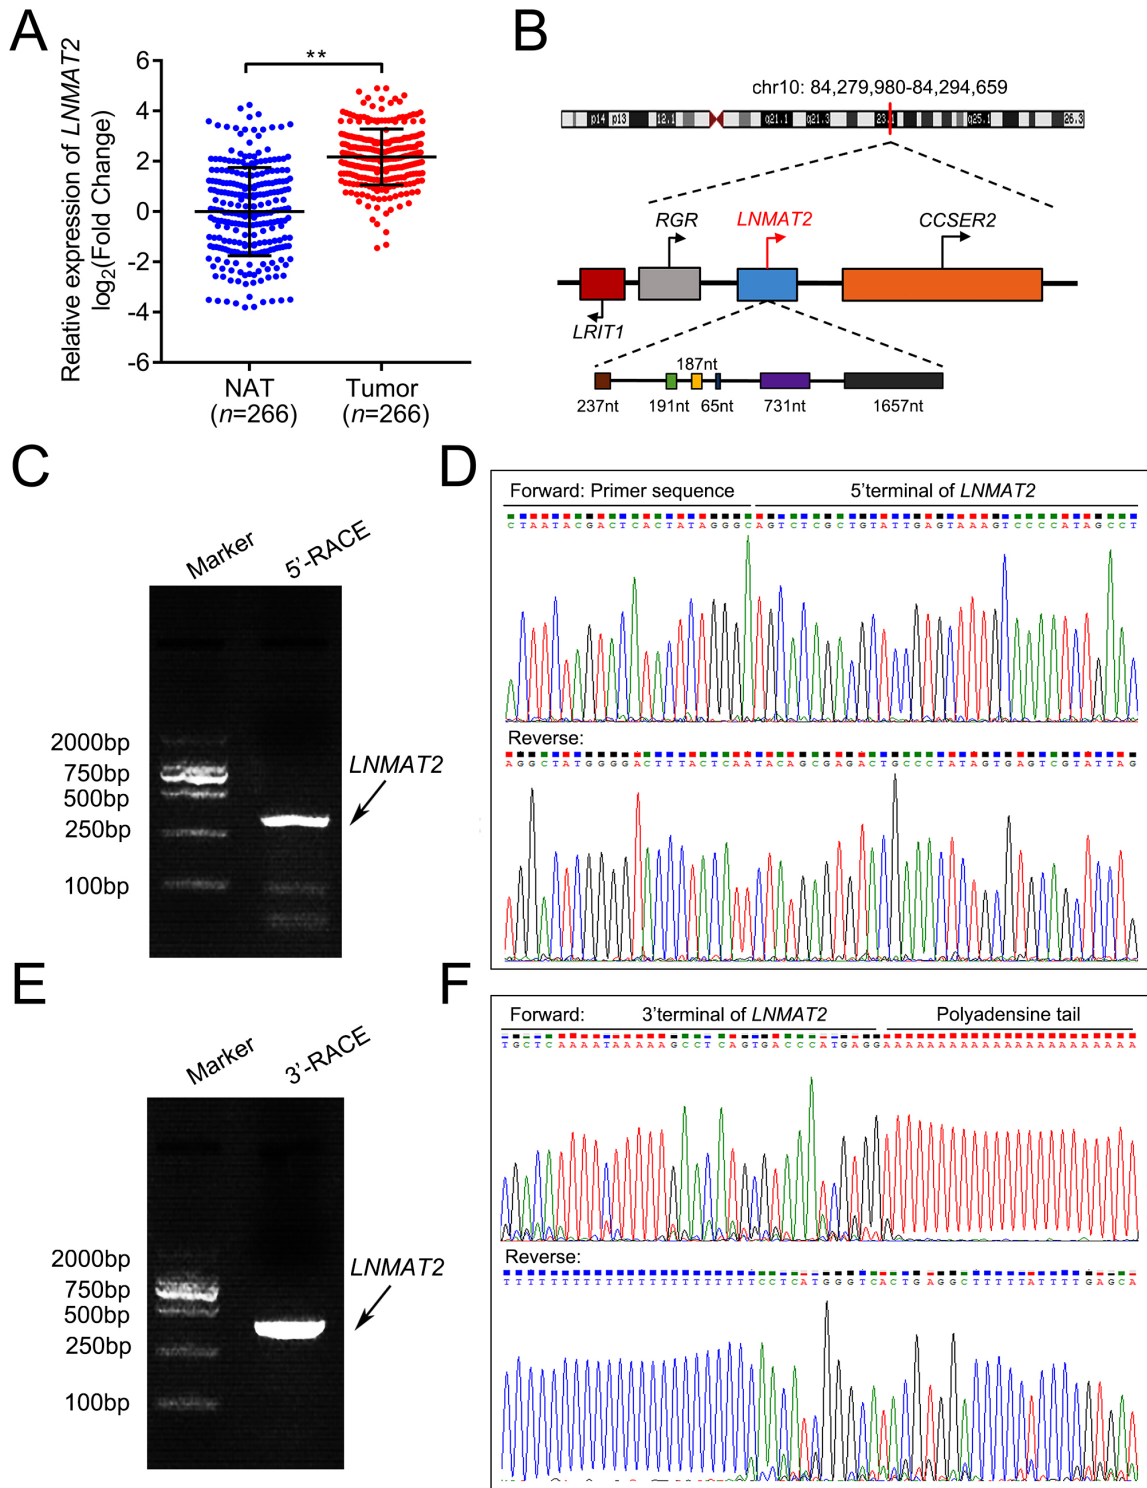

1  
 2 **Supplemental Figure 1. *LNMAT2* is upregulated in BCa.** (A) qRT-PCR analysis of  
 3 *LNMAT2* expression in a cohort of 266 BCa patient samples paired with their respective  
 4 NATs. *GAPDH* was used as an internal control. Groups were compared using the  
 5 Nonparametric Mann-Whitney *U* test. (B) Schematic representation for the genomic locus of  
 6 *LNMAT2* on chromosome and the neighboring protein coding genes of *LNMAT2* were

1 determined by RACE analysis. (**C and D**) The cap sequences and 5'-terminal sequences of  
2 *LNMAT2* were identified by 5'-RACE PCR. Representative image of agarose gel  
3 electrophoresis (C) and bidirectional sequencing of 5'-RACE products (D) are shown. (**E and**  
4 **F**) The tail sequences and 3'-terminal sequences of *LNMAT2* were identified by 3'-RACE  
5 PCR. Representative image of agarose gel electrophoresis (E) and bidirectional sequencing of  
6 3'-RACE products (F) are shown. \* $P < 0.05$ , \*\* $P < 0.01$ .

7

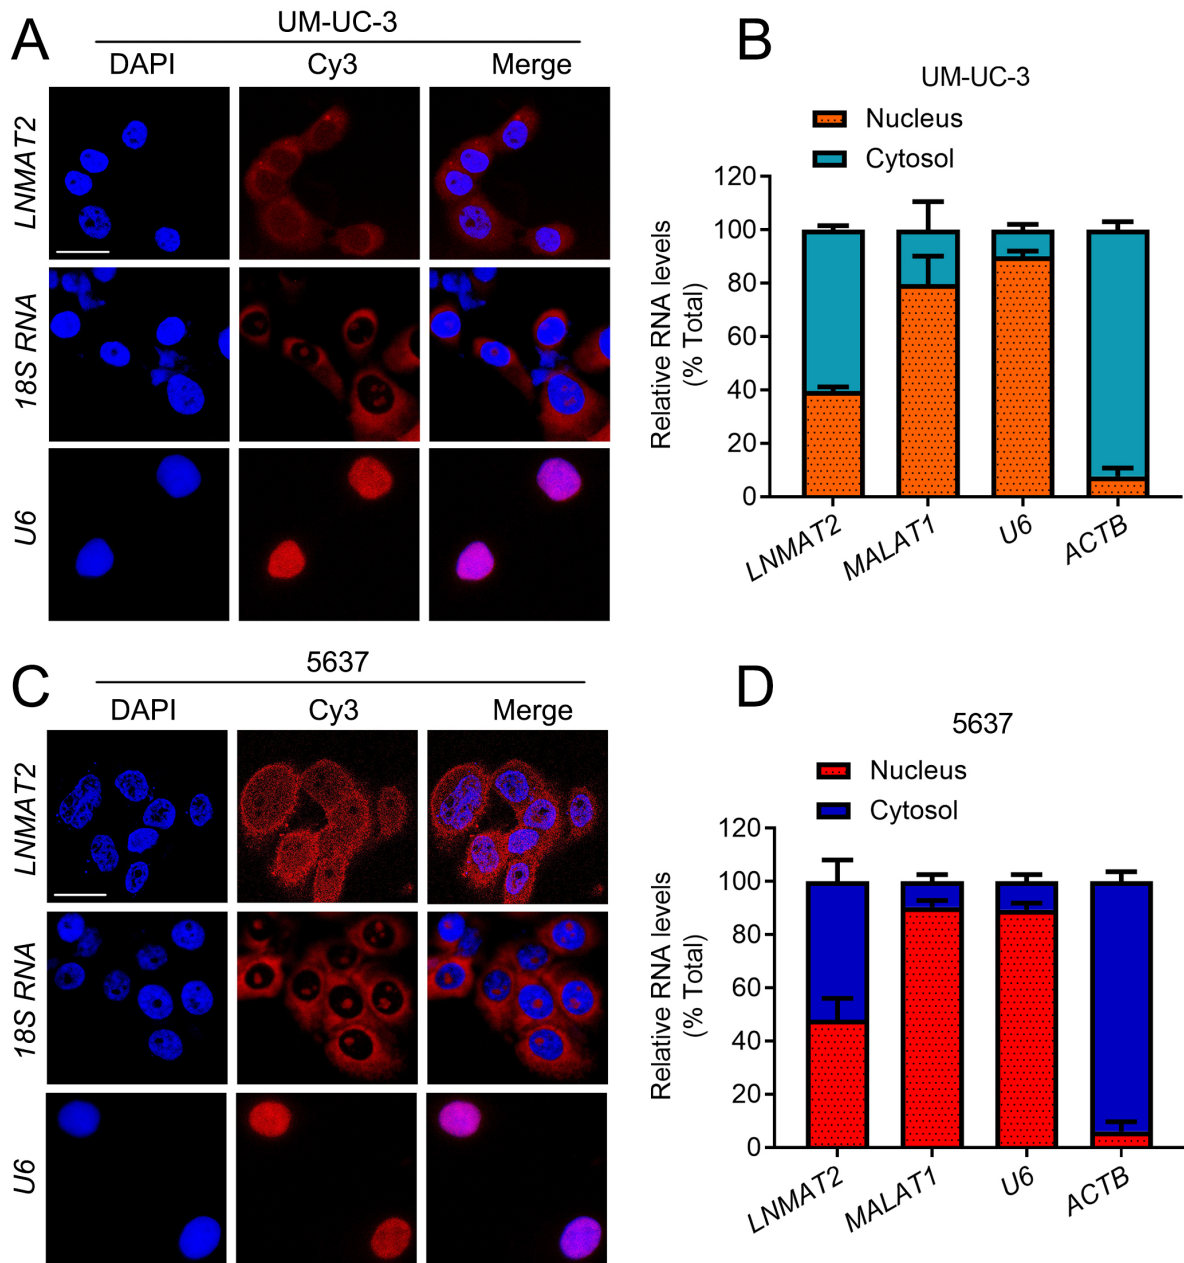

1  
2 **Supplemental Figure 2. Identification of the subcellular distribution of LNMAT2.** (A  
3 **and B)** Representative image of FISH analysis (A) and subcellular fractionation assays (B)  
4 showed the subcellular distribution of LNMAT2 in UM-UC-3 cells. U6, MALAT1 and UI  
5 were used as nuclear control. 18S rRNA and ACTB were used as cytoplasmic control. Scale  
6 bar: 5  $\mu$ m. (C **and D)** Representative image of FISH analysis (C) and subcellular  
7 fractionation assays (D) showed the subcellular distribution of LNMAT2 in 5637 cells. U6,  
8 MALAT1 and UI were used as nuclear control. Scale bar: 5  $\mu$ m. 18S rRNA and ACTB were  
9 used as cytoplasmic control. Error bars represent the SD of three independent experiments.

1 \* $P < 0.05$ , \*\* $P < 0.01$ .

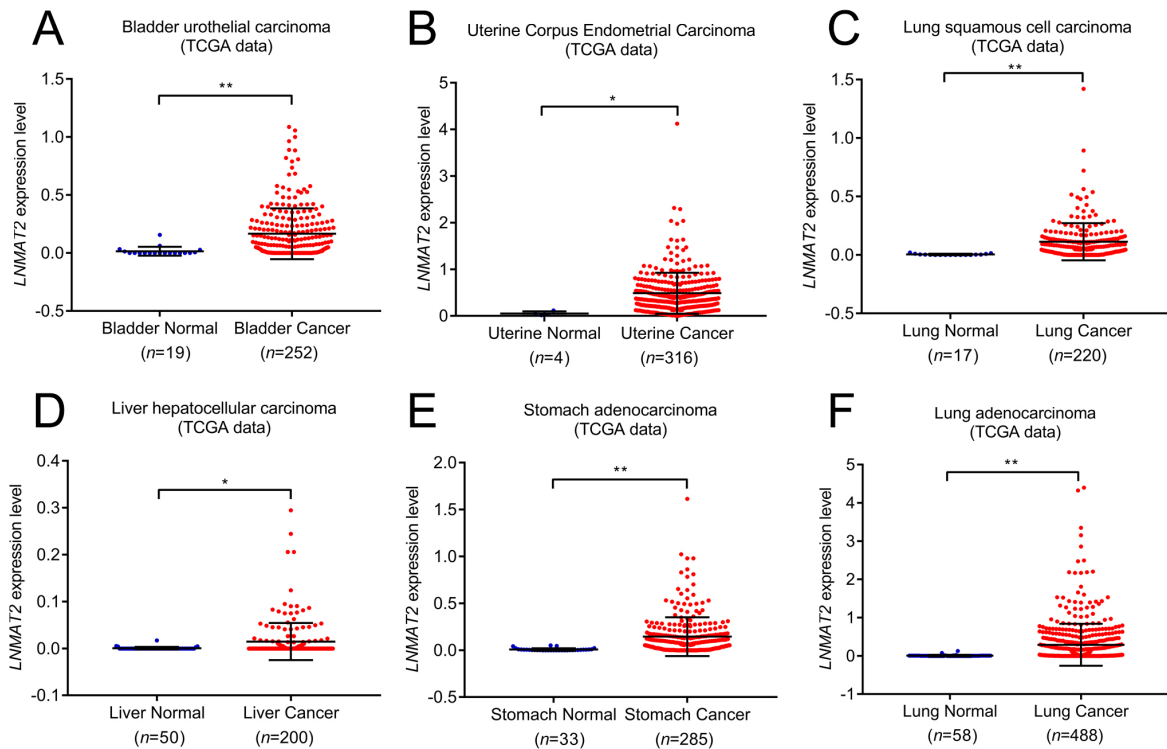

1  
2 **Supplemental Figure 3. *LNMAT2* is overexpressed in multiple human cancers. (A-F)**

3 *LNMAT2* expression were analyzed in different types of human cancers, including BCa from  
4 TCGA database. Groups were compared using the Nonparametric Mann-Whitney *U* test. The  
5 data was obtained from GEPIA (<http://gepia.cancer-pku.cn/index.html>). \* $P < 0.05$ , \*\* $P <$   
6 0.01.

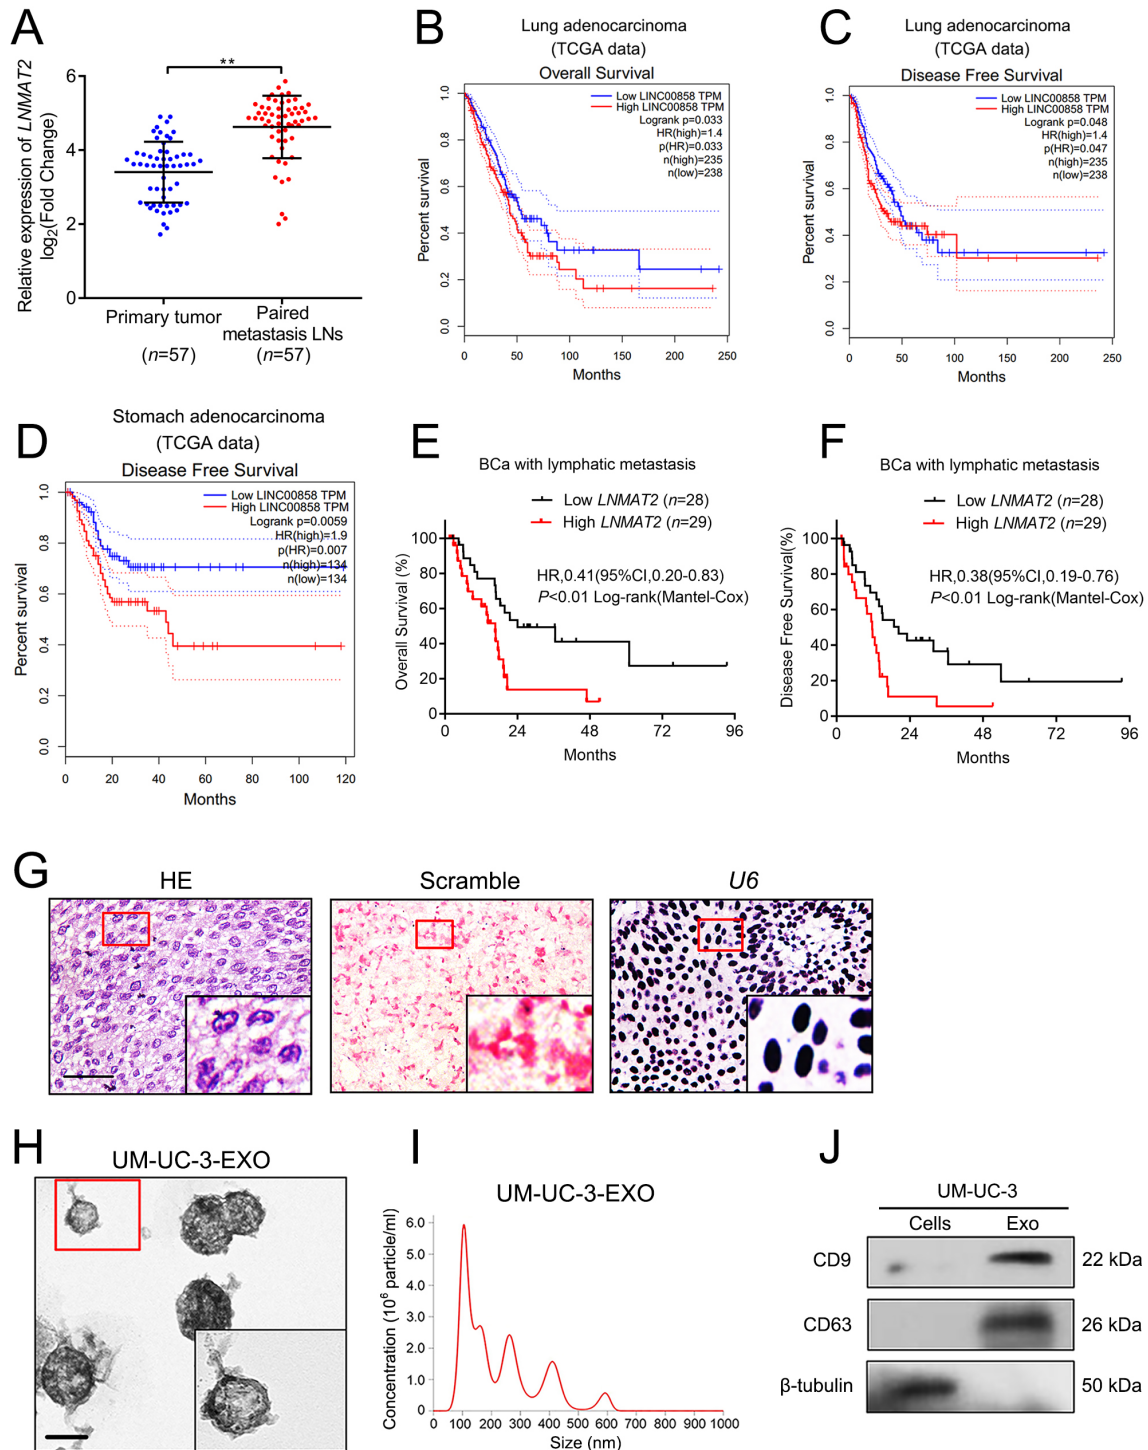

1

2 **Supplemental Figure 4. *LNMAT2* positively correlates with LN-metastasis of BCa. (A)**

3 qRT-PCR analysis of *LNMAT2* expression in primary BCa tissues and paired metastatic LNs

4 ( $n = 266$ ). *GAPDH* was used as an internal control. Groups were compared using the

5 Nonparametric Mann-Whitney *U* test. (B-D) Kaplan-Meier curves of OS and DFS were

1 determined for patients with high *LNMAT2* expression compared with low *LNMAT2*  
2 expression in various types of cancers. The data was obtained from GEPIA  
3 (<http://gepia.cancer-pku.cn/index.html>). **(E and F)** The Kaplan-Meier curve for OS and DFS  
4 of BCa patients with LN metastasis based on low vs. high expression of *LNMAT2*. The  
5 median *LNMAT2* expression was used as the cutoff value. **(G)** Representative ISH images of  
6 the scramble probe (red) as negative control and *U6* probe (blue) as positive control in BCa  
7 tissues. Scale bar: 50  $\mu\text{m}$ . **(H and I)** Purified UM-UC-3-EXO were identified by TEM (H)  
8 and NanoSight (I). Scale bar: 100 nm. **(J)** Western Blot analysis of exosomal protein marker  
9 in UM-UC-3 cell lysates or UM-UC-3-EXO. \* $P < 0.05$ , \*\* $P < 0.01$ .

10



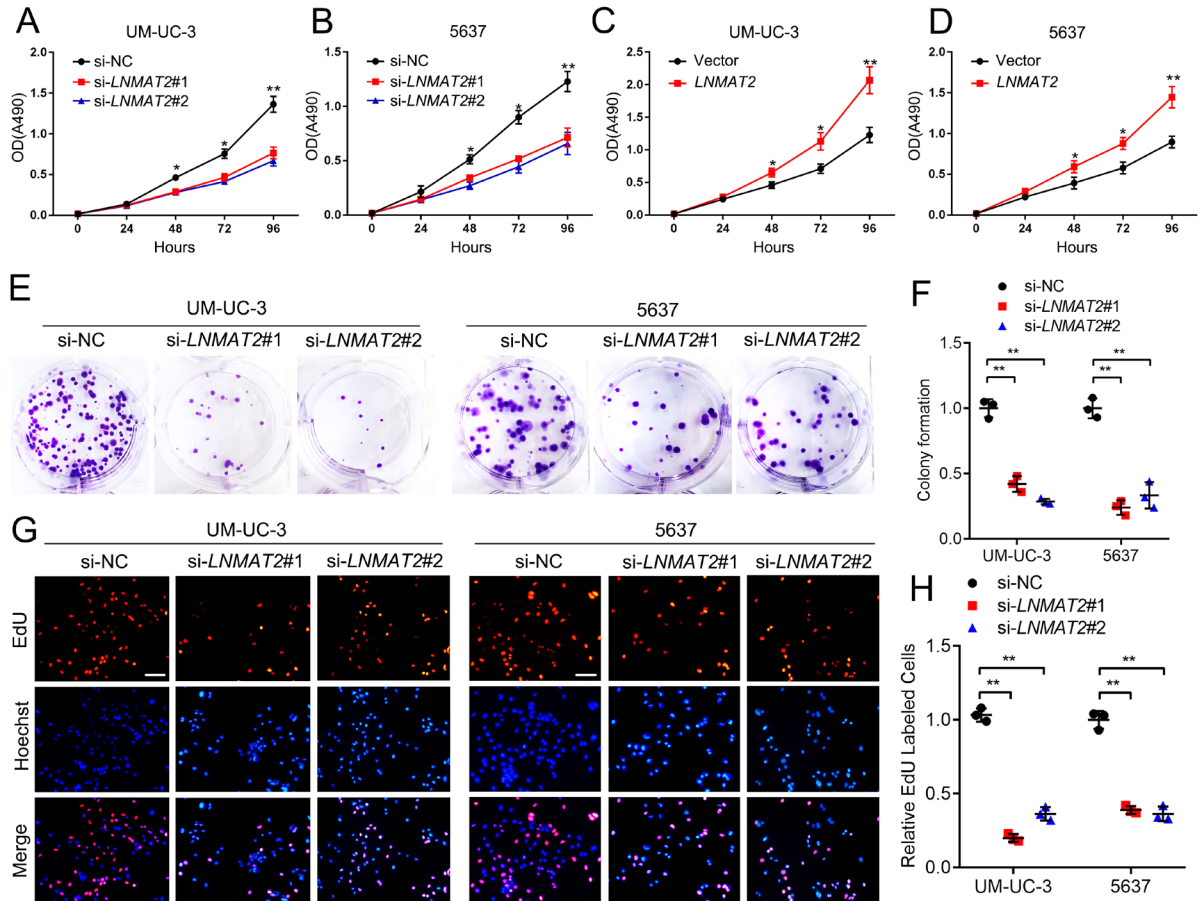

1

2 **Supplemental Figure 5. *LNMAT2* promotes proliferation of BCa cells. (A-D) CCK-8**

3 assay assessed the cell viability after knockdown (A and B) or overexpression (C and D) of

4 *LNMAT2* in UM-UC-3 or 5637 cells. Statistical significance was assessed using one-way

5 ANOVA followed by Dunnett's tests. (E and F) Representative images (E) and

6 quantifications (F) of Colony formation assay after *LNMAT2* knockdown in UM-UC-3 or

7 5637 cells. Statistical significance was assessed using one-way ANOVA followed by

8 Dunnett's tests. (G and H) Representative images (G) and quantifications (H) of EdU assay

9 after *LNMAT2* knockdown in UM-UC-3 or 5637 cells. Scale bars: 100  $\mu$ m. Statistical

10 significance was assessed using one-way ANOVA followed by Dunnett's tests. Error bars

11 represent the SD of three independent experiments. \* $P < 0.05$ , \*\* $P < 0.01$ .

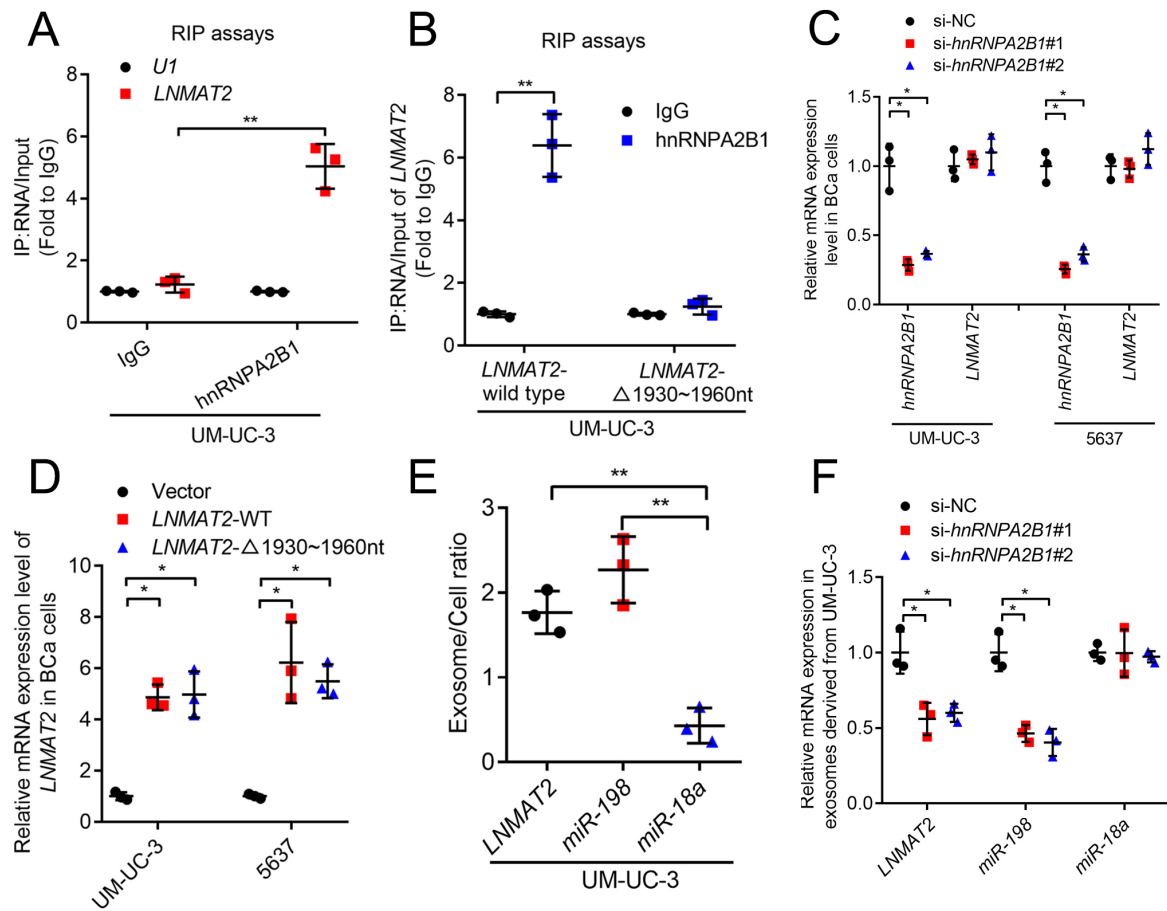

**Supplemental Figure 6. *LNMAT2* is packaged into exosomes in hnRNPA2B1-dependent**

**manner.** (A) RIP analysis using the anti-hnRNPA2B1 antibody revealed that *LNMAT2*

interacted specifically with hnRNPA2B1 in UM-UC-3 cells. IgG was used as the negative

control and *U1* was used as the non-specific control. Statistical significance was assessed

using two-tailed Student's *t*-test. (B) RIP assays performed after site-directed mutagenesis of

1930-1960 nt of *LNMAT2* in UM-UC-3 cells. Statistical significance was assessed using

two-tailed Student's *t*-test. (C) qRT-PCR analysis of the expression of hnRNPA2B1 and

*LNMAT2* in hnRNPA2B1 knockdown cells. Statistical significance was assessed using

one-way ANOVA followed by Dunnett's tests. (D) qRT-PCR analysis of *LNMAT2*

expression in respective BCa cells. Statistical significance was assessed using one-way

ANOVA followed by Dunnett's tests. (E) qRT-PCR analysis of exosomes/cells ratio of

1    respective RNAs in UM-UC-3 cells. Statistical significance was assessed using one-way  
2    ANOVA followed by Dunnett's tests. (F) qRT-PCR analysis of the expression of indicated  
3    RNAs in exosomes secreted by from hnRNPA2B1 knockdown UM-UC-3 cells. Statistical  
4    significance was assessed using one-way ANOVA followed by Dunnett's tests. *GAPDH* was  
5    used as an internal control for qRT-PCR analysis in Figure C-F. Error bars represent the SD  
6    of three independent experiments. \* $P < 0.05$ , \*\* $P < 0.01$ .

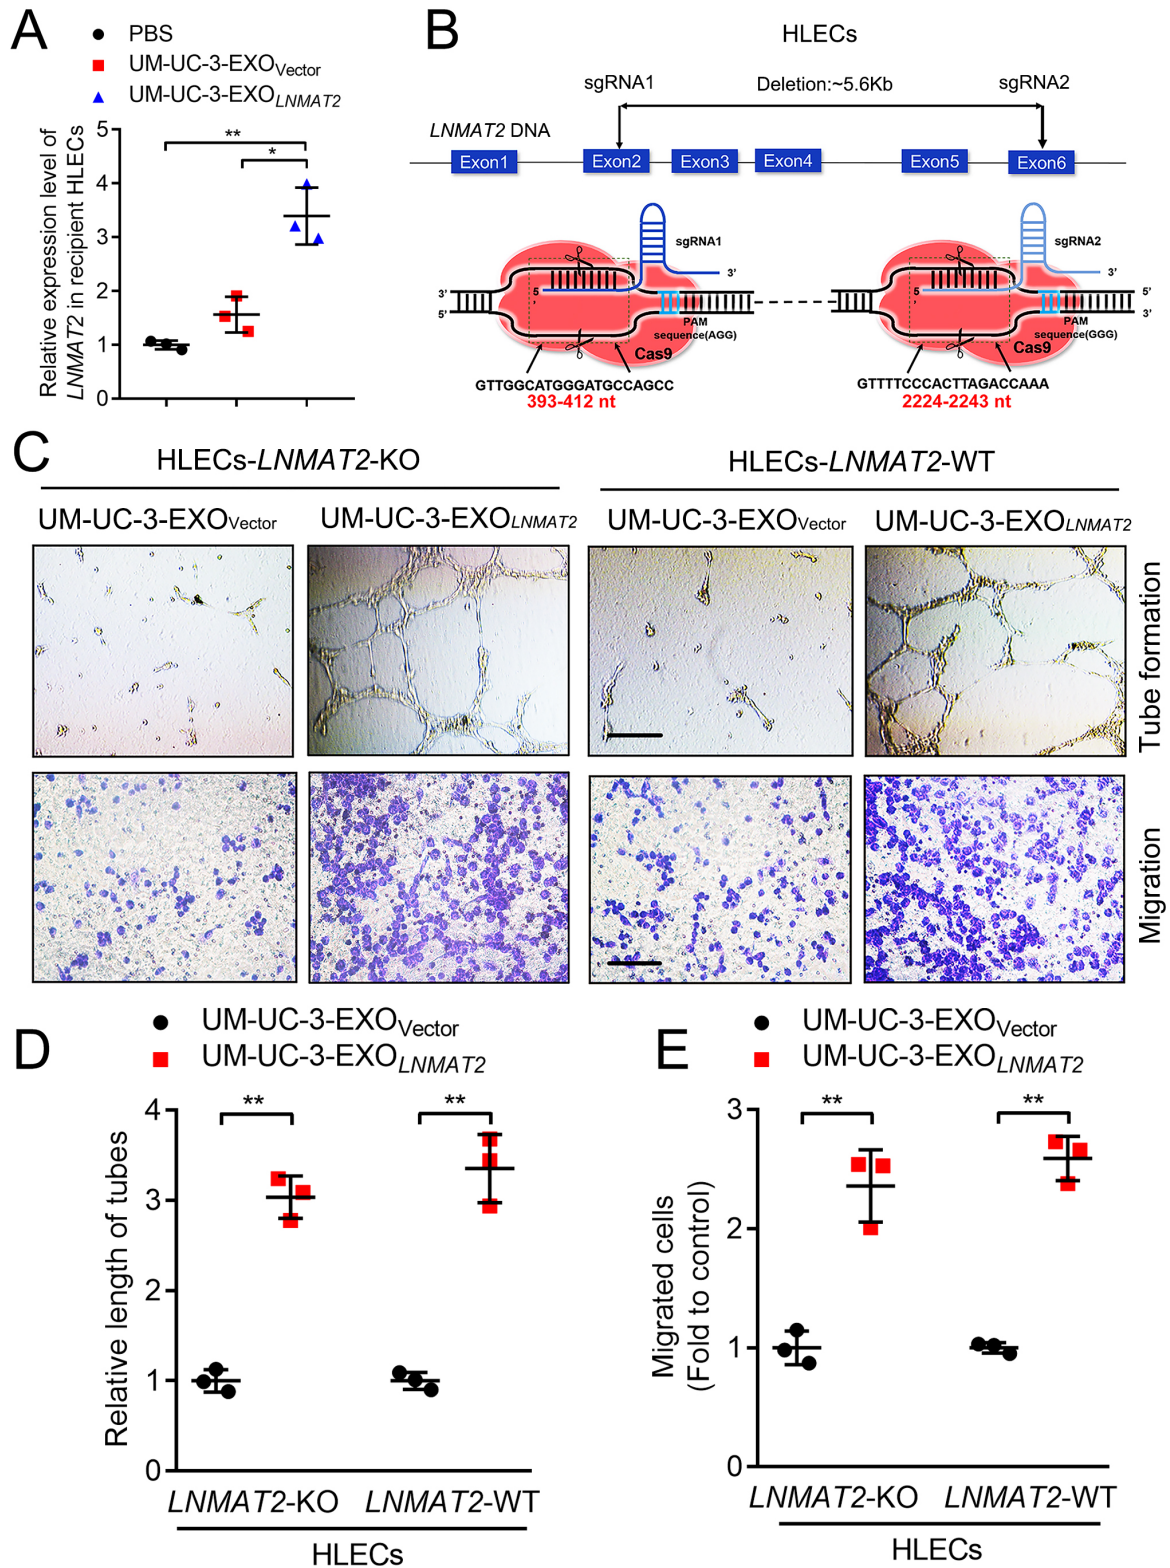

1

2 **Supplemental Figure 7. BCa-secreted exosomes induce lymphangiogenesis without**

3 **activating the expression of endogenous *LNMAT2* in HLECs. (A) qRT-PCR analysis of**

1 *LNMAT2* expression in HLECs treated with PBS, UM-UC-3-EXO<sub>Vector</sub> or  
2 UM-UC-3-EXO<sub>*LNMAT2*</sub>. *GAPDH* was used as an internal control. Statistical significance was  
3 assessed using one-way ANOVA followed by Dunnett's tests. **(B)** Schematic diagram of  
4 *LNMAT2*-KO cells from HLECs were established by CRISPR/Cas9. **(C-E)** Representative  
5 images (C) and quantifications of tube formation (D) and Transwell (E) migration by HLECs  
6 (*LNMAT2*-KO or *LNMAT2*-WT) after treating with UM-UC-3-EXO<sub>Vector</sub> or  
7 UM-UC-3-EXO<sub>*LNMAT2*</sub>. Scale bars: 100  $\mu$ m. Statistical significance was assessed using  
8 two-tailed Student's *t*-test. Error bars represent the SD of three independent experiments. \**P*  
9 < 0.05, \*\**P* < 0.01.

10

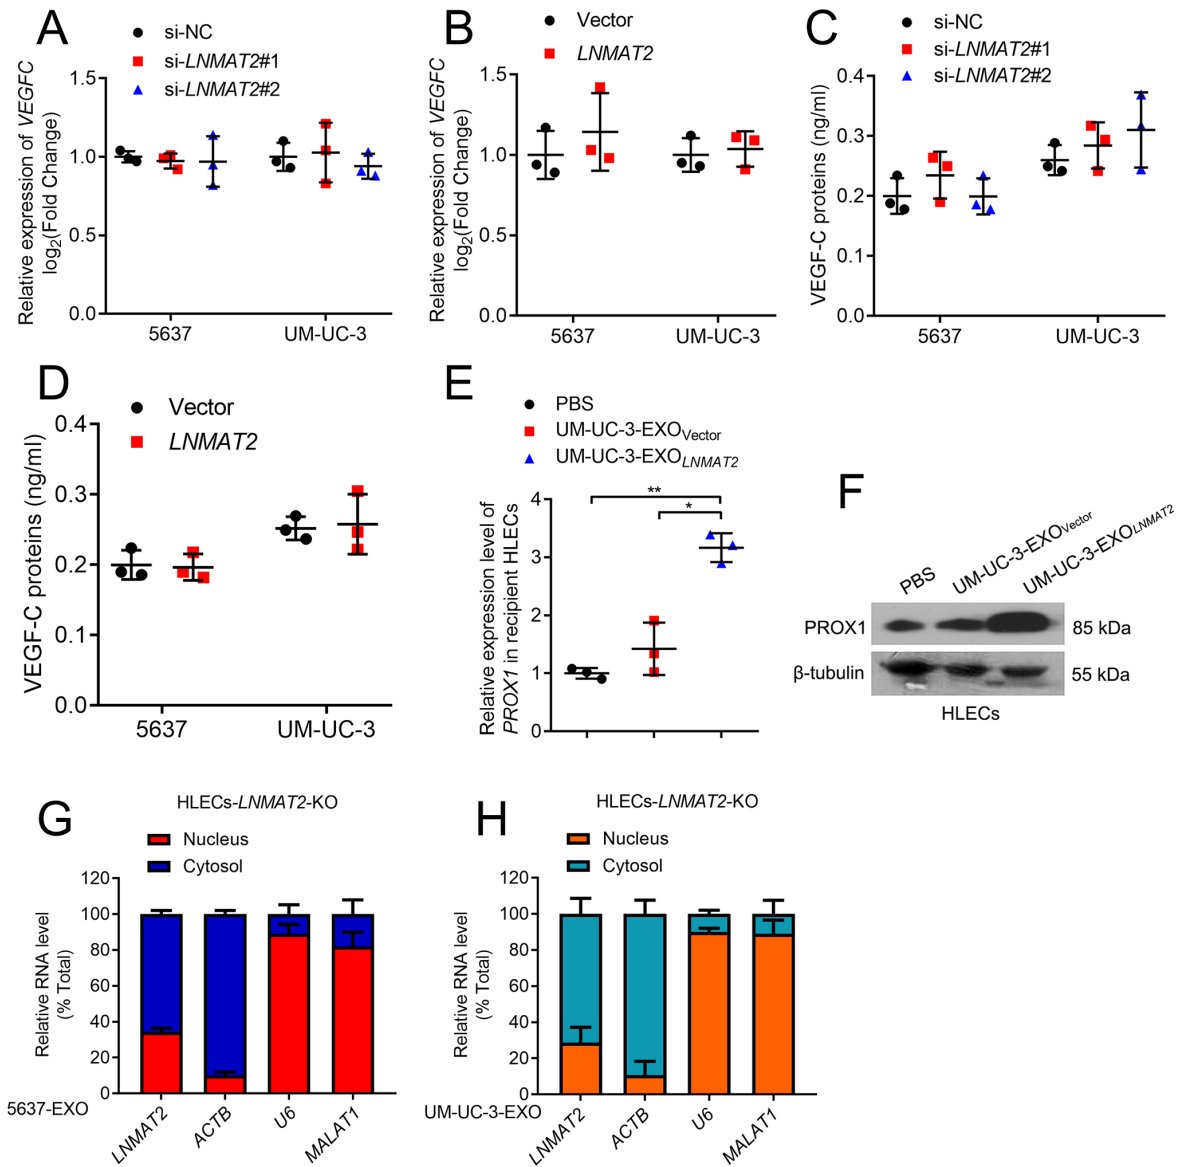

1

2 **Supplemental Figure 8. Exosomal LNMAT2 upregulates PROX1 in HLECs independent**

3 **of VEGF-C. (A and B)** qRT-PCR analysis of VEGFC expression in LNMAT2 knockdown

4 (A) and overexpressing (B) cells. GAPDH was used as an internal control. Statistical

5 significance was assessed using two-tailed Student's *t*-test and one-way ANOVA followed by

6 Dunnett's tests for multiple comparisons. (C and D) Histograms of ELISA for VEGF-C level

7 detected in LNMAT2 knockdown (C) and overexpressing (D) cells. Statistical significance

8 was assessed using two-tailed Student's *t*-test and one-way ANOVA followed by Dunnett's

1 tests for multiple comparisons. **(E)** The expression of *PROX1* in HLECs after incubation with  
2 PBS, UM-UC-3-EXO<sub>vector</sub> or UM-UC-3-EXO<sub>LNMAT2</sub> were detected by qRT-PCR. *GAPDH*  
3 was used as an internal control. Statistical significance was assessed using one-way ANOVA  
4 followed by Dunnett's tests. **(F)** Western Blot analysis of PROX1 expression in HLECs after  
5 incubation with PBS, UM-UC-3-EXO<sub>vector</sub> or UM-UC-3-EXO<sub>LNMAT2</sub>. **(G and H)** Subcellular  
6 fractionation assays showed the subcellular distribution of *LNMAT2* in *LNMAT2*-KO HLECs  
7 treated with 5637-EXO (G) or UM-UC-3-EXO (H). *MALAT1* and *UI* were used as nuclear  
8 control and *ACTB* was used as cytoplasmic control. Error bars represent the SD of three  
9 independent experiments. \**P* < 0.05, \*\**P* < 0.01.

10

11

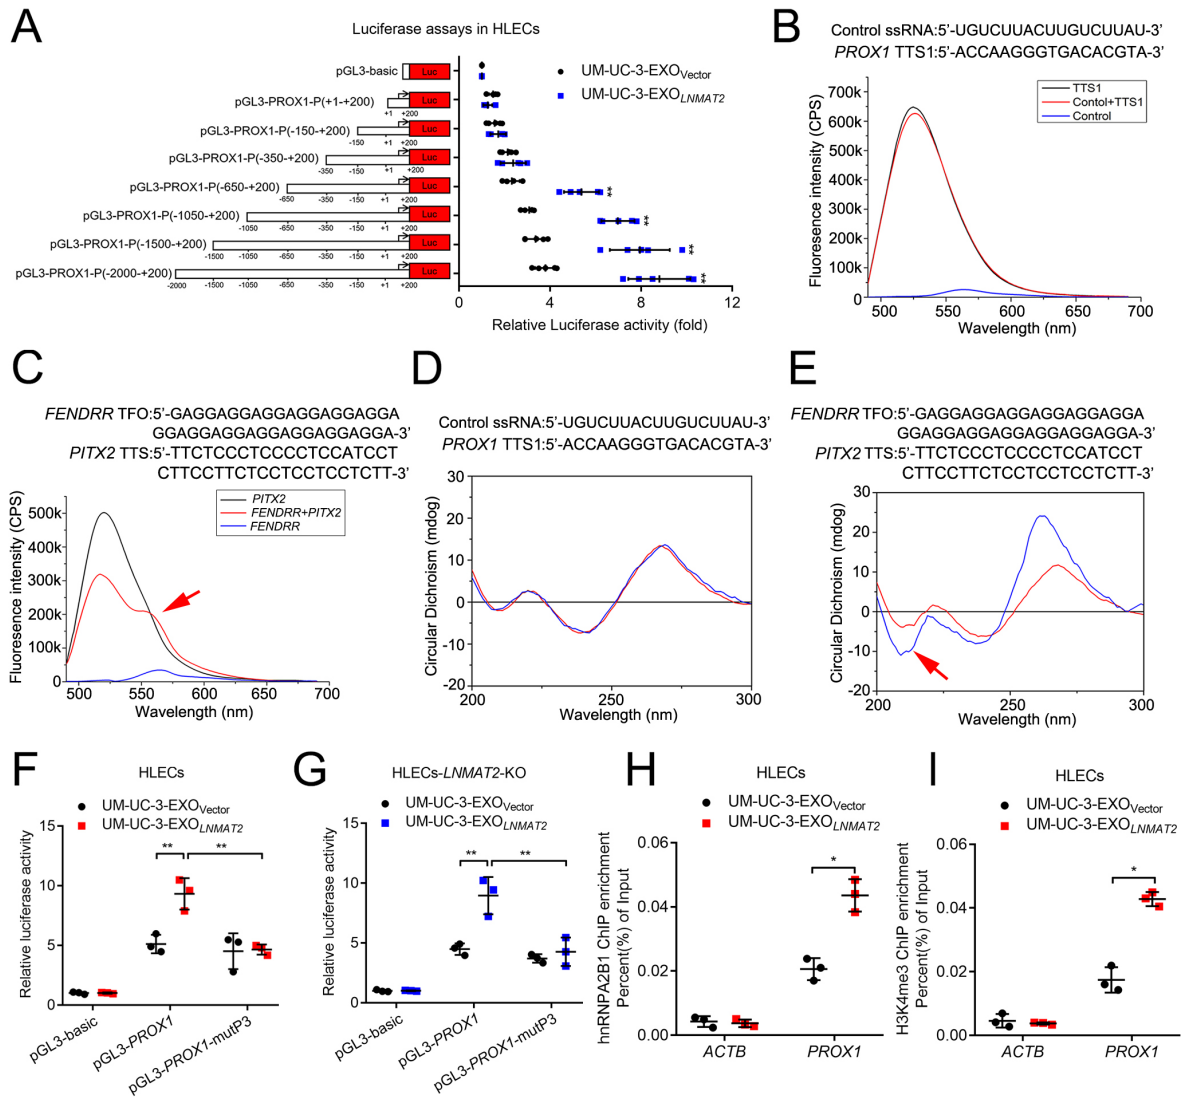

1

2 **Supplemental Figure 9. Exosomal *LNMAT2* activates lymphatic *PROX1* expression via**

3 **formation of triplex with the promoter region of *PROX1*.** (A) Sequential deletions for

4 evaluating the transcriptional activity of the *PROX1* promoter linked to Renilla luciferase

5 activity in HLECs treated with UM-UC-3-EXO<sub>Vector</sub> or UM-UC-3-EXO<sub>LNMAT2</sub>. Statistical

6 significance was assessed using one-way ANOVA followed by Dunnett's tests. (B and C)

7 FRET analysis of Control ssRNA/*PROX1* (B) and *FENDRR*/*PITX2* (C). (D and E) CD

8 spectroscopy of Control ssRNA/*PROX1* (D) and *FENDRR*/*PITX2* (E). (F and G) WT or

9 *LNMAT2* binding site mutated *PROX1* promoter were subjected to luciferase reporter assays

10 in *LNMAT2*-WT (F) or *LNMAT2*-KO (G) HLECs, respectively, treated with



1 UM-UC-3-EXO<sub>vector</sub> or UM-UC-3-EXO<sub>LNMAT2</sub>. Statistical significance was assessed using  
2 one-way ANOVA followed by Dunnett's tests. **(H and I)** ChIP-qPCR of hnRNPA2B1  
3 occupancy (H) and H3K4me3 status (I) in *PROX1* promoter after HLECs incubation with  
4 UM-UC-3-EXO<sub>vector</sub> or UM-UC-3-EXO<sub>LNMAT2</sub>. Statistical significance was assessed using  
5 one-way ANOVA followed by Dunnett's tests. Error bars represent the SD of three  
6 independent experiments. \* $P < 0.05$ , \*\* $P < 0.01$ .

7

8

**A**

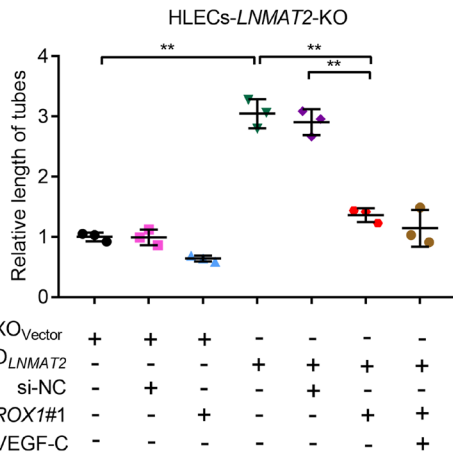

**B**

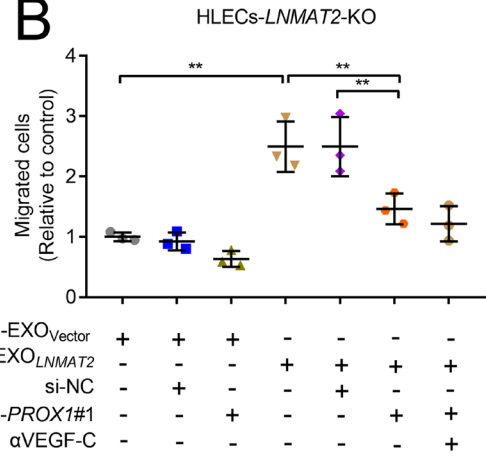

1

2

**Supplemental Figure 10. Exosomal *LNMAT2* promotes lymphangiogenesis by**

3

**upregulating PROX1 in HLECs. (A and B) Histogram analysis of tube formation (A) and**

4

**Transwell migration (B) by *LNMAT2*-KO HLECs cells treated with UM-UC-3-EXO<sub>Vector</sub> or**

5

**UM-UC-3-EXO<sub>LNMAT2</sub>, transfected with si-NC or si-*PROX1*#1, or in which VEGF-C was**

6

**inhibited. Statistical significance was assessed using one-way ANOVA followed by**

7

**Dunnett's tests. Error bars represent the SD of three independent experiments. \**P* < 0.05, \*\**P***

8

**< 0.01.**

9

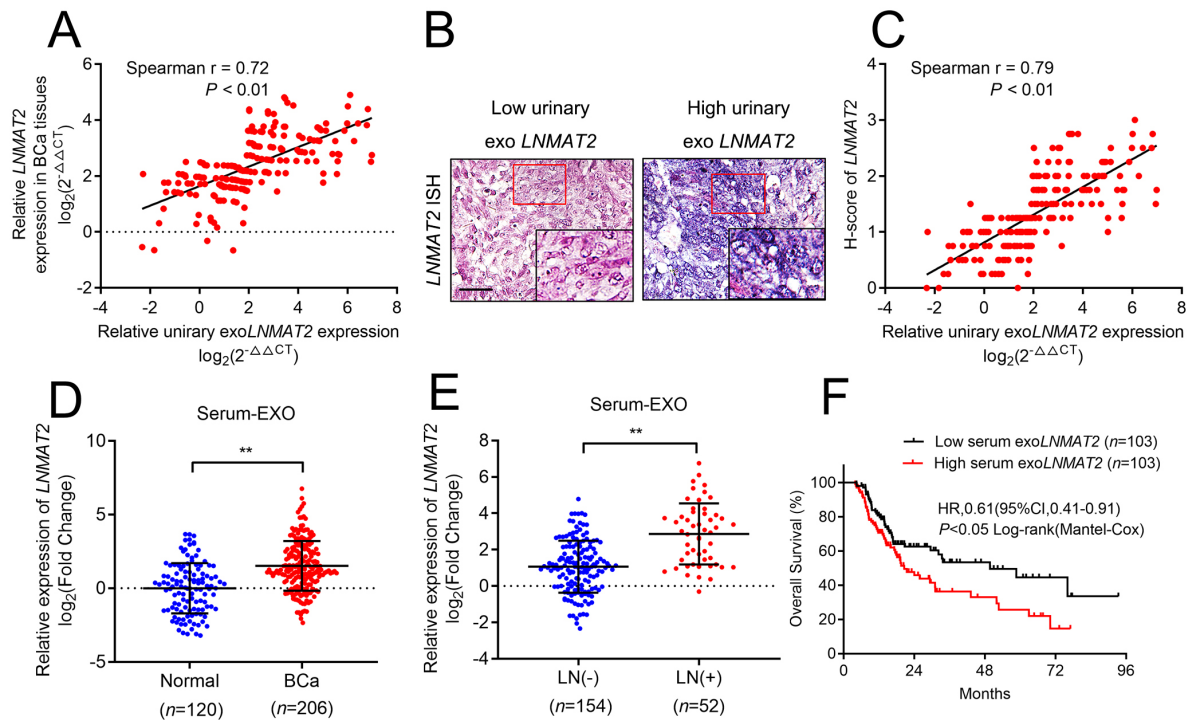

**Supplemental Figure 11. Exosomal *LNMAT2* positively correlated with LN metastasis in**

**BCa patients.** (A) Correlation analysis of *LNMAT2* expression detected by qRT-PCR in

urinary-EXO and tumor tissues of BCa patients ( $n = 206$ ). (B) Representative images of ISH

of *LNMAT2* expression in 206 cases of BCa tissues with different exosomal *LNMAT2* level.

Scale bar: 50  $\mu\text{m}$ . (C) Correlation analysis of exosomal *LNMAT2* expression in patients'

urine and *LNMAT2* expression assessed by ISH in BCa tissues ( $n = 206$ ). (D) qRT-PCR

analysis of *LNMAT2* expression in serum-EXO isolated from 206 BCa patients and 120

healthy participants. *GAPDH* was used as an internal control. Groups were compared using

the Nonparametric Mann-Whitney *U* test. (E) *LNMAT2* expression was analyzed in a

206-patient cohort of serum-EXO isolated from BCa patients with or without LN metastasis

by qRT-PCR. *GAPDH* was used as an internal control. Groups were compared using the

Nonparametric Mann-Whitney *U* test. (F) Kaplan-Meier curve of OS for BCa patients

according to the relative serum exosomal *LNMAT2* expression. The median expression of

1 serum exosomal *LNMAT2* was used as the cutoff value ( $n = 206$ ). Error bars represent the SD  
2 of three independent experiments. \* $P < 0.05$ , \*\* $P < 0.01$ .

3

4

1 **Supplemental Tables**

2 **Supplemental Table 1. Correlation between *LNMAT2* expression and clinicopathologic**  
 3 **characteristics of BCa patients**

| Characteristics             | No. of cases | <i>LNMAT2</i> expression level |      |                              |
|-----------------------------|--------------|--------------------------------|------|------------------------------|
|                             |              | Low                            | High | <i>P</i> -value <sup>A</sup> |
| <b>Total cases</b>          | 266          | 133                            | 133  |                              |
| <b>Gender</b>               |              |                                |      | 0.476                        |
| Male                        | 201          | 98                             | 103  |                              |
| Female                      | 65           | 35                             | 30   |                              |
| <b>Age</b>                  |              |                                |      | 0.456                        |
| < 65                        | 112          | 59                             | 53   |                              |
| ≥ 65                        | 154          | 74                             | 80   |                              |
| <b>T stage</b>              |              |                                |      | 0.508                        |
| T1                          | 83           | 44                             | 39   |                              |
| T2-4                        | 183          | 89                             | 94   |                              |
| <b>T grade</b>              |              |                                |      | 0.890                        |
| Low                         | 71           | 36                             | 35   |                              |
| High                        | 195          | 97                             | 98   |                              |
| <b>Lymphatic metastasis</b> |              |                                |      | <b>0.001**</b>               |
| Negative                    | 209          | 118                            | 91   |                              |
| Positive                    | 57           | 15                             | 42   |                              |

4 Abbreviations: No. of cases = number of cases; T stage = tumor stage; T grade = tumor grade.

5 <sup>A</sup> Chi-square test, \* *P* < 0.05, \*\* *P* < 0.01.

6

1 **Supplemental Table 2. Univariate and multivariate analysis of Overall Survival (OS) for**  
 2 ***LNMAT2* expression in BCa patients (*n* = 266)**

| Variables                                    | Univariate analysis |             |                              | Multivariate analysis |             |                              |
|----------------------------------------------|---------------------|-------------|------------------------------|-----------------------|-------------|------------------------------|
|                                              | HR                  | 95%CI       | <i>P</i> -value <sup>A</sup> | HR                    | 95%CI       | <i>P</i> -value <sup>A</sup> |
| Age (<65 vs. ≥65)                            | 1.087               | 0.737-1.602 | 0.675                        |                       |             |                              |
| Gender (Male vs. Female)                     | 0.782               | 0.505-1.211 | 0.270                        |                       |             |                              |
| T stage (T2-4 vs. T1)                        | 1.603               | 1.015-2.530 | 0.043*                       | 1.548                 | 0.972-2.464 | 0.066                        |
| T grade (High vs. Low)                       | 1.312               | 0.840-2.050 | 0.233                        |                       |             |                              |
| Lymphatic metastasis (positive vs. negative) | 1.730               | 1.131-2.645 | 0.011*                       | 1.431                 | 0.919-2.229 | 0.112                        |
| <i>LNMAT2</i> expression (High vs. Low)      | 1.625               | 1.098-2.405 | 0.015*                       | 1.553                 | 1.038-2.324 | 0.032*                       |

3 Abbreviations: HR = hazard ratio; 95%CI =95% confidence interval; T stage = tumor stage; T grade =  
 4 tumor grade. <sup>A</sup> Cox regression analysis, \* *P* <0.05, \*\* *P* <0.01.

5

1 **Supplemental Table 3. Univariate and multivariate analysis of Disease-Free Survival**  
 2 **(DFS) in for *LNMAT2* expression in BCa patients (*n* = 266)**

| Variables                                       | Univariate analysis |             |                              | Multivariate analysis |             |                              |
|-------------------------------------------------|---------------------|-------------|------------------------------|-----------------------|-------------|------------------------------|
|                                                 | HR                  | 95%CI       | <i>P</i> -value <sup>A</sup> | HR                    | 95%CI       | <i>P</i> -value <sup>A</sup> |
| Age (<65 vs. ≥65)                               | 0.992               | 0.705-1.397 | 0.965                        |                       |             |                              |
| Gender (Male vs. Female)                        | 0.766               | 0.521-1.127 | 0.176                        |                       |             |                              |
| T stage (T2-4 vs. T1)                           | 1.807               | 1.205-2.710 | 0.004**                      | 1.737                 | 1.150-2.625 | 0.009**                      |
| T grade (High vs. Low)                          | 1.407               | 0.948-2.089 | 0.090                        |                       |             |                              |
| Lymphatic metastasis<br>(positive vs. negative) | 1.843               | 1.270-2.675 | 0.001**                      | 1.535                 | 1.042-2.259 | 0.030*                       |
| <i>LNMAT2</i> expression<br>(High vs. Low)      | 1.502               | 1.069-2.111 | 0.019*                       | 1.442                 | 1.017-2.045 | 0.040*                       |

3 Abbreviations: HR = hazard ratio; 95%CI =95% confidence interval; T stage =tumor stage; T grade =  
 4 tumor grade. <sup>A</sup> Cox regression analysis, \* *P* <0.05, \*\* *P* <0.01.

5

1 **Supplemental Table 4. Effect of *LNMAT2* exosomes on popliteal LN metastasis in vivo**  
 2 **(*n* = 12).**

| <b>Xenograft</b>                     | <b>No. metastasis<br/>LNs</b> | <b>No.<br/>Non-metastasis<br/>LNs</b> | <b>Metastasis ratio</b> | <b><i>P</i>-value<sup>A</sup> (vs.<br/>UM-UC-3-EXO<sub>L</sub><br/><i>LNMAT2</i>)</b> |
|--------------------------------------|-------------------------------|---------------------------------------|-------------------------|---------------------------------------------------------------------------------------|
| PBS                                  | 4                             | 8                                     | 33.33%                  | 0.022*                                                                                |
| UM-UC-3-EXO <sub>Vector</sub>        | 5                             | 7                                     | 41.67%                  | 0.035*                                                                                |
| UM-UC-3-EXO <sub><i>LNMAT2</i></sub> | 10                            | 2                                     | 83.33%                  |                                                                                       |

3 <sup>A</sup>Chi-square test. \* *P* < 0.05, \*\* *P* < 0.01.



1 **Supplemental Table 5. The possible TFO predicted by LongTarget for *LNMAT2* and**  
 2 ***PROX1* promoter.**

| <b>Oligo ID</b> | <b>TFO (5'-3')</b> | <b>Oligo ID</b> | <b>TTS (5'-3')</b> | <b>Score</b> |
|-----------------|--------------------|-----------------|--------------------|--------------|
| <b>TFO1</b>     | TGGCTTCCCAATCTATC  | <b>TTS1</b>     | ACCAAGGGTGACACGTA  | 67           |
| <b>TFO2</b>     | TCATCCACGAACCAGA   | <b>TTS2</b>     | ATTGGGTGCTGGGGCC   | 56           |
| <b>TFO3</b>     | GAGTCCCTCATCCGG    | <b>TTS3</b>     | CCGGGATGGAGGCC     | 52           |
| <b>TFO4</b>     | CCACCCAGCTAATCAG   | <b>TTS4</b>     | GGCGAGTGAATTAGTG   | 45           |
| <b>TFO5</b>     | TGAAACTTCACTTC     | <b>TTS5</b>     | ATTTGTA ACTTGCA    | 41           |

3 Abbreviation: TFO, Triplex-forming oligos; Score, triplex-forming potential score.

4

1 **Supplemental Table 6. Effect of *LNMAT2* exosomes on popliteal LN metastasis in vivo**  
 2 **(*n* = 16).**

| <b>Xenograft</b>                                          | <b>No. metastasis<br/>LNs</b> | <b>No.<br/>Non-metastasi<br/>s LNs</b> | <b>Metastasis ratio</b> | <b><i>P</i>-value<sup>A</sup> (vs.<br/>UM-UC-3-EXO<sub>LN</sub><br/><i>MAT2</i>+<math>\alpha</math>VEGF-C)</b> |
|-----------------------------------------------------------|-------------------------------|----------------------------------------|-------------------------|----------------------------------------------------------------------------------------------------------------|
| PBS                                                       | 5                             | 11                                     | 31.25%                  | 0.004**                                                                                                        |
| UM-UC-3-EXO <sub>Vector</sub> + $\alpha$<br>VEGF-C        | 7                             | 9                                      | 43.75%                  | 0.028*                                                                                                         |
| UM-UC-3-EXO <sub>LN<i>MAT2</i></sub> +<br>$\alpha$ VEGF-C | 13                            | 3                                      | 81.25%                  |                                                                                                                |

3 <sup>A</sup> Chi-square test. \* *P* < 0.05, \*\* *P* < 0.01.

1 **Supplemental Table 7. Correlation between exosomal *LNMAT2* expression and**  
 2 **clinicopathologic characteristics of BCa patients**

| Characteristics             | No. of cases | Exosomal <i>LNMAT2</i> expression level |      |                              |
|-----------------------------|--------------|-----------------------------------------|------|------------------------------|
|                             |              | Low                                     | High | <i>P</i> -value <sup>A</sup> |
| <b>Total cases</b>          | 206          | 103                                     | 103  |                              |
| <b>Gender</b>               |              |                                         |      | 0.757                        |
| Male                        | 148          | 73                                      | 75   |                              |
| Female                      | 58           | 30                                      | 28   |                              |
| <b>Age</b>                  |              |                                         |      | 0.888                        |
| < 65                        | 81           | 40                                      | 41   |                              |
| ≥ 65                        | 125          | 63                                      | 62   |                              |
| <b>T stage</b>              |              |                                         |      | 0.080                        |
| T1                          | 53           | 32                                      | 21   |                              |
| T2-4                        | 153          | 71                                      | 82   |                              |
| <b>T grade</b>              |              |                                         |      | 0.878                        |
| Low                         | 59           | 30                                      | 29   |                              |
| High                        | 147          | 73                                      | 74   |                              |
| <b>Lymphatic metastasis</b> |              |                                         |      | <b>0.001**</b>               |
| Negative                    | 154          | 94                                      | 60   |                              |
| Positive                    | 52           | 9                                       | 43   |                              |

3 Abbreviations: No. of cases = number of cases; T stage = tumor stage; T grade = tumor grade.

4 <sup>A</sup> Chi-square test, \* *P* < 0.05, \*\* *P* < 0.01.

5

1 **Supplemental Table 8. Univariate and multivariate analysis of Overall Survival (OS) for**  
 2 **exosomal *LNMAT2* expression in BCa patients (*n* = 206)**

| Variables                                                | Univariate analysis |            |                              | Multivariate analysis |            |                              |
|----------------------------------------------------------|---------------------|------------|------------------------------|-----------------------|------------|------------------------------|
|                                                          | HR                  | 95%CI      | <i>P</i> -value <sub>A</sub> | HR                    | 95%CI      | <i>P</i> -value <sub>A</sub> |
| Age (<65 vs. ≥65)                                        | 1.04                | 0.692-1.57 | 0.837                        |                       |            |                              |
| Gender (Male vs. Female)                                 | 1.20                | 0.762-1.90 | 0.426                        |                       |            |                              |
| T stage (T2-4 vs. T1)                                    | 1.06                | 0.676-1.66 | 0.794                        |                       |            |                              |
| T grade (High vs. Low)                                   | 0.91                | 0.604-1.40 | 0.695                        |                       |            |                              |
| Lymphatic metastasis (positive vs. negative)             | 2.02                | 1.329-3.09 | 0.001**                      | 1.58                  | 0.997-2.50 | 0.051                        |
| Urinary exosomal <i>LNMAT2</i> expression (High vs. Low) | 2.07                | 1.375-3.14 | 0.001**                      | 1.77                  | 1.132-2.77 | 0.012*                       |

3 Abbreviations: HR = hazard ratio; 95%CI =95% confidence interval; T stage = tumor stage; T grade =  
 4 tumor grade. <sup>A</sup> Cox regression analysis, \* *P* <0.05, \*\* *P* <0.01.

5  
6  
7

1  
2

**Supplemental Table 9. Univariate and multivariate analysis of Disease-Free Survival (DFS) for exosomal *LNMAT2* expression in BCa patients (*n* = 206)**

| Variables                                                | Univariate analysis |            |                              | Multivariate analysis |            |                              |
|----------------------------------------------------------|---------------------|------------|------------------------------|-----------------------|------------|------------------------------|
|                                                          | HR                  | 95%CI      | <i>P</i> -value <sup>A</sup> | HR                    | 95%CI      | <i>P</i> -value <sup>A</sup> |
| Age (<65 vs. ≥65)                                        | 0.98                | 0.666-1.40 | 0.864                        |                       |            |                              |
| Gender (Male vs. Female)                                 | 1.16                | 0.775-1.76 | 0.455                        |                       |            |                              |
| T stage (T2-4 vs. T1)                                    | 1.19                | 0.786-1.81 | 0.404                        |                       |            |                              |
| T grade (High vs. Low)                                   | 0.81                | 0.558-1.18 | 0.286                        |                       |            |                              |
| Lymphatic metastasis (positive vs. negative)             | 1.73                | 1.170-2.57 | 0.006**                      | 1.36                  | 0.893-2.09 | 0.150                        |
| Urinary exosomal <i>LNMAT2</i> expression (High vs. Low) | 1.91                | 1.323-2.76 | 0.001**                      | 1.72                  | 1.158-2.57 | 0.007*                       |

3  
4  
5

Abbreviations: HR = hazard ratio; 95%CI =95% confidence interval; T stage = tumor stage; T grade = tumor grade. <sup>A</sup>Cox regression analysis, \* *P* <0.05, \*\* *P* <0.01.

**Supplemental Table 10. Primer sequences used in this manuscript.**

| Primer name      | Forward primer (5'-3')          | Reverse primer (5'-3') | Application |
|------------------|---------------------------------|------------------------|-------------|
| <i>GAPDH</i>     | ATCACCATCTTCCAGGAGCGA           | CCTTCTCCATGGTGGTGAAG   | qRT-PCR     |
|                  |                                 | AC                     |             |
| <i>LNMAT2</i>    | GGTTCAGTTGGGCAAAAGGC            | TCATTCAGTCACAGGGTGGC   | qRT-PCR     |
| <i>hnRNPA2B1</i> | CAACCTTCTAACTACGGTCCA           | CAGTATCGGCTCCTCCCAC    | qRT-PCR     |
|                  | A                               |                        |             |
| <i>PROX1</i>     | CAGCCCGAAAAGAACAGAAG            | GGGTCTAGCTCGCACATCTC   | qRT-PCR     |
| <i>UI</i>        | GGGAGATACCATGATCACGAA           | CCACAAATTATGCAGTCGAG   | qRT-PCR     |
|                  | GGT                             | TTTC                   |             |
| <i>miR-198</i>   | GACAGAGGTCCAGAGGGGAG            | Universal primer       | qRT-PCR     |
|                  |                                 | CAGTGCGTGTCTGGAGT      |             |
| <i>miR-18a</i>   | GATAGCAGCACAGAAATATTG           | Universal primer       | qRT-PCR     |
|                  | GC                              | CAGTGCGTGTCTGGAGT      |             |
| <i>PROX1-P1</i>  | CCCCCACCCCTTTTATATTT            | ACAGGAAGACTGCACGTCAC   | ChIRP       |
| <i>PROX1-P2</i>  | GCGTCCTGGAAGAGCTAGTG            | GGAAGAGAGGAGGGGAGAG    | ChIRP       |
|                  |                                 | G                      |             |
| <i>PROX1-P3</i>  | ATGTGAAACCTCTGGCACCT            | GGAGAAAAAGTGGGGGTTTT   | ChIRP       |
| <i>PROX1-P4</i>  | CTGCGATTTATGCGTTTGAA            | TTGCAAACATCTGGCGATTA   | ChIRP       |
| <i>PROX1-P5</i>  | GGTCAAAGGGACGTTCTAGC            | GGTCAAAGGGACGTTCTAGC   | ChIRP       |
| <i>GAPDH-RNA</i> | CAAGGCTGAGAACGGGAAG             | AGGTAGTTTTCGTGGATGCCA  | ChIRP       |
| <i>GAPDH-DNA</i> | GTTTCCAGGAGTGCCTTTGTG           | ATTAGGGCAGACAATCCCGG   | ChIRP       |
|                  |                                 | C                      |             |
| <i>PROX1</i>     | ATGTGAAACCTCTGGCACCT            | GGAGAAAAAGTGGGGGTTTT   | ChIP-qPCR   |
| <i>ACTB</i>      | GAAGCTAAGTCCTGCCCTCA            | CAGTGAGGACCCTGGATGTG   | ChIP-qPCR   |
| <i>LNMAT2</i>    | Universal primer in SMARTer kit | ATTCAGCACTAGGACTAGGA   | Nested      |
| 5'RACE           |                                 | CAGC                   | PCR         |
|                  |                                 |                        | (Outer)     |

|                        |                                 |                                 |           |
|------------------------|---------------------------------|---------------------------------|-----------|
| <i>LNMAT2</i>          | Universal primer in SMARTer kit | CCTTGCAATTTGTCTCTTGTG           | (Inner)   |
| 5'RACE                 |                                 | GCC                             |           |
| <i>LNMAT2</i>          | AAGGGATTGAGAAGCTTTC             | Universal primer in SMARTer kit | (Outer)   |
| 3'RACE                 |                                 |                                 |           |
| <i>LNMAT2</i>          | CCATGGACTTCTGAGCCTTC            | Universal primer in SMARTer kit | (Inner)   |
| 3'RACE                 |                                 |                                 |           |
| si- <i>LNMAT2</i> #1   | CCAGCUUCUAAGGUGGUAT             | UAACCACCUUAGAAGCUGG             | siRNAs    |
|                        | T                               | TT                              |           |
| si- <i>LNMAT2</i> #2   | CCUAGUCCUAGUGCUGAAUT            | AUUCAGCACUAGGACUAGG             | siRNAs    |
|                        | T                               | TT                              |           |
| si- <i>hnRNPA2B1</i> # | GCAAUUCAUUGAGCGCAUUT            | GCAAUUCAUUGAGCGCAUU             | siRNAs    |
| 1                      | T                               | TT                              |           |
| si- <i>hnRNPA2B1</i> # | GCUCUUUAUUGGUGGCUUAT            | UAAGCCACCAAUAAAGAGC             | siRNAs    |
| 2                      | T                               | TT                              |           |
| si- <i>PROX1</i> #1    | UGGAGAAGUAUGCGCGUCAT            | UGACGCGCAUACUUCUCCAT            | siRNAs    |
|                        | T                               | T                               |           |
| <i>LNMAT2</i> -sgRN    | caccGTTGGCATGGGATGCCAG          |                                 | CRISPR/Ca |
| A#1                    | CCgttt                          |                                 | s9        |
| <i>LNMAT2</i> -sgRN    | caccGTTTTCCCACTTAGACCA          |                                 | CRISPR/Ca |
| A#2                    | AAgttt                          |                                 | s9        |

1 **Supplemental Table 11. Probes used in in situ hybridization (ISH) and Chromatin**  
 2 **isolation by RNA purification (ChIRP).**

|                     | Probe sequences (5'-3') | Label                                | Application |
|---------------------|-------------------------|--------------------------------------|-------------|
| <i>LNMAT2_odds1</i> | GACACCAATGGGATCATTCA    | 3'-Biotin                            | ChIRP       |
| <i>LNMAT2_odds2</i> | CTGGTAAGGAATGGTTCCAG    | 3'-Biotin                            | ChIRP       |
| <i>LNMAT2_odds3</i> | AAAACCAGGACAGATGGGCA    | 3'-Biotin                            | ChIRP       |
| <i>LNMAT2_odds4</i> | TCACAGAGACAACCTGGCACA   | 3'-Biotin                            | ChIRP       |
| <i>LNMAT2_odds5</i> | GACCTCAGCAATGACACATT    | 3'-Biotin                            | ChIRP       |
| <i>LNMAT2_even1</i> | GATCTCCAACCTCTGCTAGAA   | 3'-Biotin                            | ChIRP       |
| <i>LNMAT2_even2</i> | CCAAAAGAGGTTTGGCTTGG    | 3'-Biotin                            | ChIRP       |
| <i>LNMAT2_even3</i> | CAGACAAGTGTCAGTAGTG     | 3'-Biotin                            | ChIRP       |
| <i>LNMAT2_even4</i> | GATTGGGAAGCCAGATTAGG    | 3'-Biotin                            | ChIRP       |
| <i>LNMAT2_even5</i> | CAAGTTTATCTGCAAGACCC    | 3'-Biotin                            | ChIRP       |
| <i>LNMAT2</i>       | AGGTAATCACAGAGCTGGAGCA  | 5'-DIG labeled and 3'-DIG<br>labeled | ISH         |
| <i>U6</i>           | CACGAATTTGCGTGTCATCCTT  | 5'-DIG labeled and 3'-DIG<br>labeled | ISH         |
| <b>Scramble</b>     | GTGTAACACGTCTATACGCCCA  | 5'-DIG labeled and 3'-DIG<br>labeled | ISH         |

3 Abbreviation: DIG, Digoxigenin.



## 1 **Supplemental Methods**

### 2 **Antibodies**

3 Anti-LYVE-1 antibody (ab33682) for IHC, anti-PROX1 antibody (ab38692) for IHC,  
4 anti-luciferase antibody (ab181640) for IHC, anti-CD63 antibody (ab134054) for immunoblot,  
5 anti-hnRNPA2B1 antibody (ab31645) for immunofluorescence, RIP and ChIP were  
6 purchased from Abcam (MA, USA). Anti-hnRNPA2B1 antibody (9304) for immunoblot,  
7 anti-CD9 antibody (13403) for immunoblot, anti-PROX1 antibody (14963) for immunoblot,  
8 anti- $\beta$ -tubulin antibody (2146) for immunoblot, anti-H3K27me3 antibody (9733) for ChIP,  
9 HRP-linked anti-mouse IgG antibody (7076) and HRP-linked anti-rabbit IgG antibody (7074)  
10 for immunoblot were purchased from Cell Signaling Technology (MA, USA). Anti-Ki67  
11 antibody (ZM-0166) for IHC was purchased from Sino Biological Inc. (Beijing, China). Goat  
12 anti-rabbit IgG-HRP antibody (SA00001-15) and Goat anti-mouse IgG-HRP antibody  
13 (SA00001-1) for IHC were purchased from Proteintech Group (Chicago, USA). Control  
14 mouse IgG antibody, control rabbit IgG antibody and anti-RNA pol II antibody were provided  
15 in the EZ-Magna RIP kit or EZ-Magna ChIP A/G kit (Millipore, MA, USA). Alexa Fluor™  
16 555 Phalloidin antibody for immunofluorescence were purchased from Invitrogen (CA,  
17 USA).

### 18 **Isolation and purification of exosomes**

19 To isolate the exosomes from cell cultured media, BCa cells were grown in media  
20 supplemented with 10% exosome-depleted FBS for 72 h. The supernatant was collected and  
21 sequentially centrifuged at  $1,000 \times g$  for 5 min,  $2,000 \times g$  for 10 min and  $10,000 \times g$  for 30  
22 min. The obtained supernatant was filtered through 0.22  $\mu m$  filter (PALL, New York, USA)

1 followed by ultracentrifugation at  $120,000 \times g$  for 70 min in a 70Ti rotor (Beckman,  
2 California, USA). The supernatant was discarded and pellets were resuspended with PBS.  
3 The suspension was subsequently ultra-centrifuged at  $120,000 \times g$  for another 70 min. The  
4 purified exosomes were subjected to the following experiments. All the centrifugations were  
5 conducted at  $4^{\circ}\text{C}$ .

6 To isolate the exosomes from urine, mid-stream urine from patients or healthy volunteers  
7 was collected in 50 ml centrifuge tubes (Corning, New York, USA) and centrifuged at  $2,000$   
8  $\times g$  for 20 min followed by  $10,000 \times g$  for 30 min. The supernatant was transferred to a  $0.22$   
9  $\mu\text{m}$  filter and the flow was collected and purified by ultracentrifugation as mentioned above.  
10 All the centrifugations were conducted at  $4^{\circ}\text{C}$ .

11 To isolate the exosomes from serum, blood sample was collected from patients or healthy  
12 volunteers using Vacutainer (BD, USA) and centrifuged at  $1,000 \times g$  for 10 min. The  
13 supernatant was subsequently centrifuged at  $2,000 \times g$  for 20 min and filtered through a  $0.22$   
14  $\mu\text{m}$  filter. The flow was collected and purified by ultracentrifugation as mentioned above. All  
15 the centrifugations were conducted at  $4^{\circ}\text{C}$ .

## 16 **Electron microscopy analysis**

17 Exosomes were loaded on a Formvar-carbon-coated electron microscope grid  
18 (Polysciences) for 30 min. Then the grid was washed in PBS and fixed in 2% glutaraldehyde  
19 (Sigma Aldrich) for 10 min. The grid was subsequently washed in PBS for 5 times and  
20 counter-stained with 2% uranyl acetate (Sigma Aldrich) for 1 min. Air-dried grids were  
21 viewed with a Hitachi transmission electron microscope.

## 22 **Exosomes Internalization**

1 Exosomes were stained with PKH67 Green Fluorescent Cell Linker Kit (Sigma Aldrich, St  
2 Louis, USA) according to the manufacturer's instruction and the staining was terminated by  
3 adding 1% BSA. PKH67-labeled exosomes were precipitated by ultracentrifugation and  
4 resuspended in ECM containing 10% exosome-depleted FBS. Then exosomes were added to  
5 HLECs and incubated for 12 h After washing twice with PBS, cells were fixed with 4%  
6 formaldehyde. The nuclei were stained with DAPI. A Zeiss confocal microscope system was  
7 used to obtain the images.

### 8 **Tube formation assays and Transwell assays of HLECs**

9 In tube formation assays, 1:2 growth factor reduced Matrigel (BD Biosciences, CA, USA)  
10 and ECM mixture was pre-coated to 24-well plate and solidified at 37°C for 30 min.  $1 \times 10^5$   
11 HLECs were seeded on the 24-well plate and incubated with either PBS, or exosomes for 12  
12 h. Images were recorded by an inverted microscope and the length of lymphatic tubes were  
13 determined.

14 The migration abilities of HLECs were evaluated by Transwell assays. HLECs treated with  
15 either PBS or exosomes for 48 h and were harvested and suspended in ECM without FBS and  
16 then seeded in the upper chamber of Transwell apparatus (Corning Costar Corp, MA, USA),  
17 at a density of  $1 \times 10^5$  cells per well. In the lower chamber, medium containing 10% FBS was  
18 added. After 18 h incubation, the cells were fixed in 4% paraformaldehyde (PFA) and stained  
19 with crystal violet. The number of cells migrated from upper chamber to lower chamber were  
20 counted in five random areas under Nikon Eclipse Ti microscope (Nikon, Tokyo, Japan) after  
21 wiping off the remaining cells in the upper chamber.

### 22 **CCK-8, colony formation and EdU assays**

1 For CCK-8 assays,  $4 \times 10^3$  BCa cells were seeded in 96-well plates and transfected with  
2 siRNA or overexpression plasmid. After culturing overnight, cells were treated with CCK-8  
3 solution according to the manufacturer's instructions of the CCK-8 kit (APEX BIO, USA).  
4 The cell viability was measured by OD450 with a microplate reader (Epoch, BioTek, USA)  
5 every 24 h for 4 days.

6 For EdU assays, siRNA transfected BCa cells were seeded in 24-well plates and incubated  
7 for 24 h. Cells were stained with EdU and DAPI according to the manufacturer's instructions  
8 of the EdU kit (RioboBio, Guangzhou, China). The images were obtained with an Olympus  
9 laser scanning microscope system (Tokyo, Japan).

10 For the colony formation assays,  $1 \times 10^3$  siRNA transfected BCa cells were seeded into  
11 6-well plates and cultured for 2 weeks. The colonies were stained with 0.1% crystal violet.  
12 Visible colonies were counted and wells were measured in triplicate for each treatment group.

### 13 **Subcutaneous tumorigenicity assay**

14 Subcutaneous tumorigenicity assay were performed by subcutaneously inoculating  
15 luciferase-labeled UM-UC-3 cells ( $5 \times 10^6$ ) into BALB/c nude mice (the Experimental  
16 Animal Center, Sun Yat-sen University, Guangzhou, China). Mice were randomly divided  
17 into three groups ( $n = 10$ ) and were intratumorally injected with either (i) PBS, (ii)  
18 UM-UC-3-EXO<sub>vector</sub> and (iii) UM-UC-3-EXO<sub>LNMT2</sub> (20  $\mu$ g per dose), respectively every 3  
19 days. The subcutaneous tumors were analyzed using a PerkinElmer IVIS Spectrum In Vivo  
20 Imaging System. The tumors were excised to measure the weight and volume 5 weeks after  
21 the treatment, and fixed in 37% formalin overnight followed by paraffin-embedding. Serial  
22 sections were stained with HE and IHC. The sections were visualized with Nikon Eclipse Ti

1 microscope (Nikon, Japan).

## 2 **Lentivirus-mediated transduction**

3 The full-length *LNMAT2* was cloned into the pCDH-CMV-MCS-EF1-Puro (with or  
4 without luciferase) and the double-stranded oligonucleotides targeting *LNMAT2* was cloned  
5 into the pLKO.1-Puro vector. The lentivirus was produced by co-transfecting lentiviral  
6 vectors and packaging vectors, psPAX2 (Addgene #12260, MA, USA) and pMD2.G  
7 (Addgene #12259) into HEK-293T cells. After 72 h, the culture media contained virus were  
8 harvested and concentrated at 4°C overnight in a LentiX™ Concentrator. Purified lentivirus  
9 was then used to infect BCa cells with 8 mg/ml Polybrene (Sigma Aldrich). Transfected cells  
10 were selected by adding puromycin (Sigma Aldrich) for 2 weeks to obtain a stable cell line.

## 11 **RNA extraction and quantitative real-time PCR (qRT-PCR) analysis**

12 Total RNA from cells, tissues and exosomes was extracted using the TRIzol reagent (Life  
13 Technologies) and purified using RNeasy mini kit (QIAGENMD, USA) following the  
14 manufacturers' instructions. RNA quantity was measured using a NanoDrop 2000  
15 spectrophotometer (Thermo Fisher Scientific, Inc). 500ng of total RNA was mixed with 2μl  
16 of 5×PrimeScript RT Master Mix (Takara Biotechnology Co., Ltd., Dalian, China) and  
17 reversely transcribed to cDNA. qRT-PCR analysis was conducted using the TBGreen II  
18 (Takara Biotechnology Co., Ltd.) and analyzed on a Roche Light-Cycler system (Roche, CA,  
19 USA). The results were shown as the fold change using the  $2^{-\Delta\Delta CT}$  method. *GAPDH* served  
20 as an internal control. The primers sequences used in qRT-PCR analysis were provided  
21 in Supplemental Table 10.

## 1 **5' and 3' Rapid amplification of cDNA ends (RACE) of *LNMAT2***

2 5' and 3' RACE assays were performed following the instructions of a SMARTer RACE  
3 5'/3' kit (CLONTECH Laboratories, CA, USA). Briefly, gene specific RACE product was  
4 generated through PCR amplification. The PCR products were separated on a 1% agarose gel  
5 and the gel extraction products were further subjected to bidirectional sequencing using  
6 indicated primers. *LNMAT2*-specific nested PCR primers sequences used for 5' and 3' RACE  
7 analysis was provided in Supplemental Table 10.

## 8 **ISH and IHC analysis**

9 For ISH, the double-(5' and 3')-digoxin (DIG)-labeled probes targeted *LNMAT2* were used.  
10 Scramble probe was used as negative control. The slides were dewaxed with  
11 dimethylbenzene and rehydrated with gradient alcohol, followed by proteinase K digestion  
12 and fixation with 4% PFA. After hybridization with the *LNMAT2* probe at 42°C overnight,  
13 the slides were subsequently incubated in anti-digoxin antibody at 4°C overnight. Finally, the  
14 staining was performed using Nitroblue Tetrazolium/5-Bromo-4-Chloro-3-Indolylphosphate  
15 (Roche, CA, USA) and images were captured with a Nikon Eclipse Ti microscope (Nikon,  
16 Tokyo, Japan). The H-score for *LNMAT2* expression was calculated as follows:  $H\text{-score} = \sum (P$   
17  $\times I)$  where P represents the percentage of stained cells; I represents the intensity of the  
18 staining which was defined as: 0 (absent), 1 (weak), 2 (moderate) and 3 (strong). The probes  
19 for ISH assays are listed in Supplemental Table 11.

20 For IHC, the formalin-fixed, paraffin-embedded sections were dewaxed and rehydrated as  
21 mentioned above, treated with 3% hydrogen peroxide followed by EDTA buffer for antigen  
22 retrieval. The sections were then blocked in goat serum for 30 min, incubated with respective

1 primary antibodies at 4°C overnight and subsequent with horseradish peroxidase-conjugated  
2 secondary antibodies for 30 min at room temperature. Finally, the sections were stained with  
3 the DAB substrate and hematoxylin. Images were recorded by Nikon Eclipse Ti microscope.

#### 4 **Colocalization of *LNMAT2* and hnRNPA2B1**

5 The colocalization of *LNMAT2* and hnRNPA2B1 were confirmed by fluorescence staining.  
6 Briefly, 5637 cells were seeded on a glass-bottomed confocal plate and cultured overnight.  
7 After fixation with 4% PFA and permeabilization with 0.5% Triton, hybridization was carried  
8 out overnight with the *LNMAT2* probes conjugated with Alexa Fluor 555 (Invitrogen, CA,  
9 USA) at 37°C in 2×SSC, 10% formamide and 10% dextran. Subsequently, Anti-hnRNPA2B1  
10 was incubated in the dark overnight followed by incubation with secondary antibody for 1h.  
11 Finally, the nuclei were stained by DAPI and the images were captured under a confocal  
12 microscope.

#### 13 **Western Blot analysis**

14 Protein extraction were performed using RIPA lysis buffer (Pierce, IL, USA) containing  
15 protease inhibitor (Roche, CA, USA). Protein extracts were subjected to 10%  
16 SDS-polyacrylamide gel electrophoresis followed by electro-transfer to polyvinylidene  
17 difluoride membrane. After 1h of pre-membrane blocking with 5% BSA, the proteins were  
18 incubated with respective primary antibodies at 4°C overnight followed by secondary  
19 antibodies incubation at room temperature for 1 h. The detection of proteins was carried out  
20 using ECL reagent.

#### 21 **Nuclear fractionation**

1  $1 \times 10^7$  cells were harvested and washed with RNase-free PBS. After incubation with  
2  $5\times$ fraction buffer (1.28M Sucrose, 20mM MgCl<sub>2</sub>, 40mM Tris-HCl, pH 7.5, 4% Triton X-100)  
3 diluted in RNase-free water for 15min on ice, cells were subjected to centrifugation at 2500  
4 rpm for 15min, and the pellet containing the nuclear fraction was used for RNA extraction.

#### 5 **ELISA analysis**

6 Cell culture supernatant of *LNMAT2*-overexpressing or knockdown BCa cells were  
7 harvested and centrifuged at 3000 rpm for 5 min to remove the pellets. The level of secreted  
8 VEGF-C in cell culture supernatant was quantified using the Human VEGF-C Quantikine  
9 ELISA Kit (Cat. No. DVEC00, R&D) according to the manufacturer's instructions.

#### 10 **Serial deletion analysis and site-directed mutagenesis**

11 *LNMAT2* with various deletions were amplified by using a series of paired 3' nested  
12 primers with common 5' primers or 5' nested PCR primers with common 3' primers and  
13 cloned into pcDNA3.0 for in vitro transcription. The resulting RNAs were further subjected  
14 to RNA pull-down assays. The mutant *LNMAT2* RNAs ( $\Delta$ 1930-1960) described in the  
15 manuscript were synthesized following the instruction of QuikChange Site-directed  
16 Mutagenesis Kit (Stratagene, CA, USA).

#### 17 **ChIP and ChIRP assays**

18 The EZ-Magna ChIP A/G kit (Millipore, MA, USA) was used for ChIP analysis. HLECs ( $2$   
19  $\times 10^7$ ) pretreated with exosomes were fixed in 1% formaldehyde and the nuclear extracts  
20 prepared with completed nuclear lysis buffer were sheared to 100 ~ 200 bp in lengths by  
21 ultrasonication. 10% of the total sample volume was removed as a sample input. The



1 remaining sonicated lysate was incubated with anti-hnRNPA2B1 antibody (Abcam, MA,  
2 USA) or anti-H3K4me3 antibody (Abcam, MA, USA) at 4°C overnight and followed by  
3 precipitation with streptavidin magnetic beads. The retrieved chromatin was subjected to  
4 qRT-PCR analysis. Mouse IgG and anti-RNA pol II antibody (Millipore, MA, USA) served  
5 as the negative and positive control respectively.

6 For ChIRP assays, the Magna ChIRP RNA Interactome Kit (Millipore, MA, USA) was  
7 used according to the manufacturer's instructions.  $2 \times 10^7$  HLECs pretreated with exosomes  
8 were harvested and treated with 1% glutaraldehyde. Then the cells were lysed and sonicated  
9 into 100-200 bp fragments in a 4°C water bath. The biotinylated probes were separated into  
10 "odds" and "even" groups and hybridized with the sonicated cell lysates for 4 h at 37°C.  
11 Then, DNA and RNA were respectively extracted from post-ChIRP beads, and qRT-PCR was  
12 performed to analyze the enrichment of DNA and RNA retrieval. The probes for ChIRP  
13 assays are listed in Supplemental Table 11.

#### 14 **Dual-luciferase reporter assays**

15 Luciferase assays were performed to examine the interaction between *PROXI* promoter  
16 and *LNMAT2*. The indicated *PROXI* promoter fragments were cloned into the pGL3 plasmid  
17 and transfected into the HLECs cells pretreated with exosomes from  
18 *LNMAT2*-overexpressing or untreated BCa cells. The pGL3 vector was used as a negative  
19 control. A reporter plasmid containing Renilla luciferase was used as the standard reference.  
20 The luciferase activities were detected following the instruction of the Dual-Luciferase  
21 Reporter Assay System (Promega, WI, USA) 24 h after transfection. Renilla luciferase  
22 intensity was normalized against Firefly luciferase intensity.

1 **Bioinformatics Analysis**

2 The enrichment of hnRNPA2B1 binding motifs in RNAs is obtained from POSTAR2. The  
3 secondary structure of *LNMAT2* is predicted using RNAalifold. The *LNMAT2* binding motifs  
4 in *PROX1* promoter and binding sequences in *LNMAT2* are predicted by LongTarget.
